# Supplementary material
Source: MDPI journal article supplement (https://www.mdpi.com/1999-4907/14/6/1262)
Supplement: s1 [file s1]

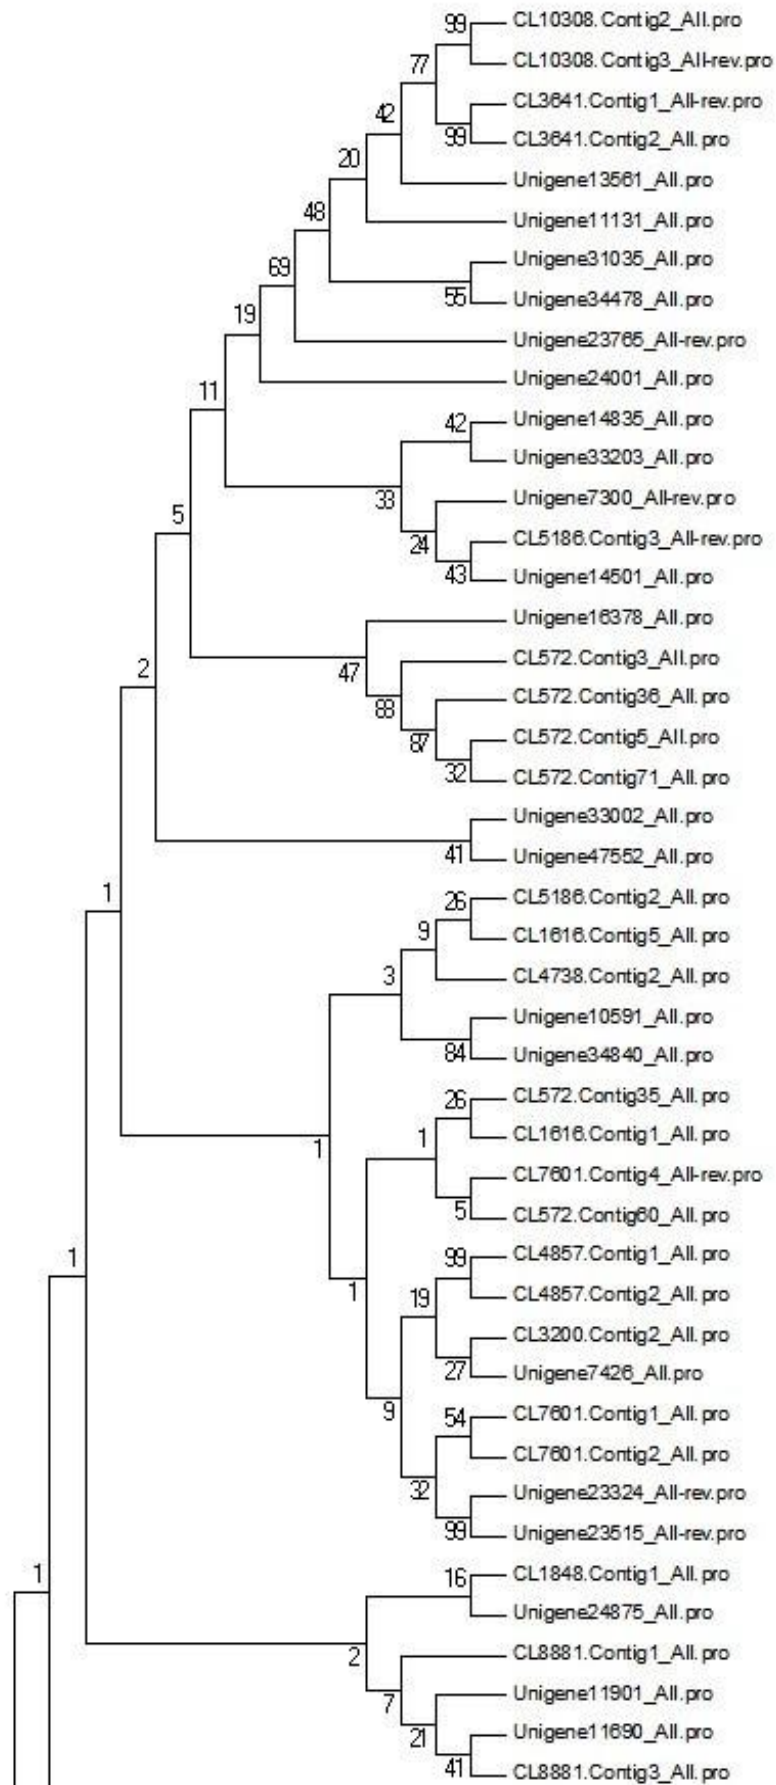

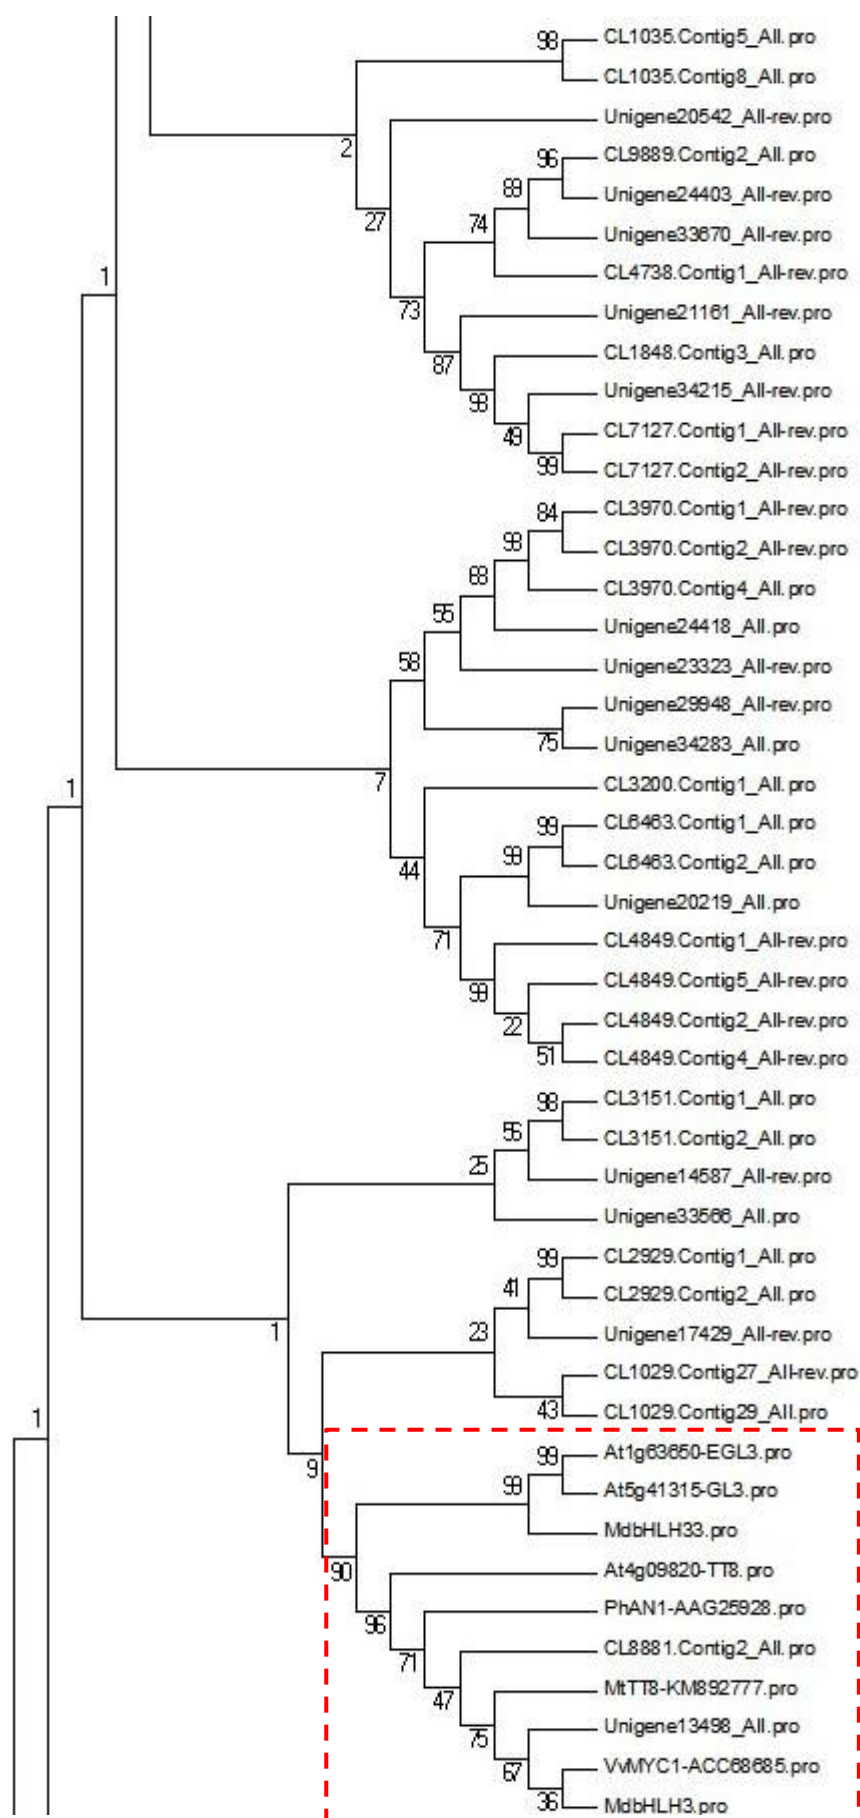

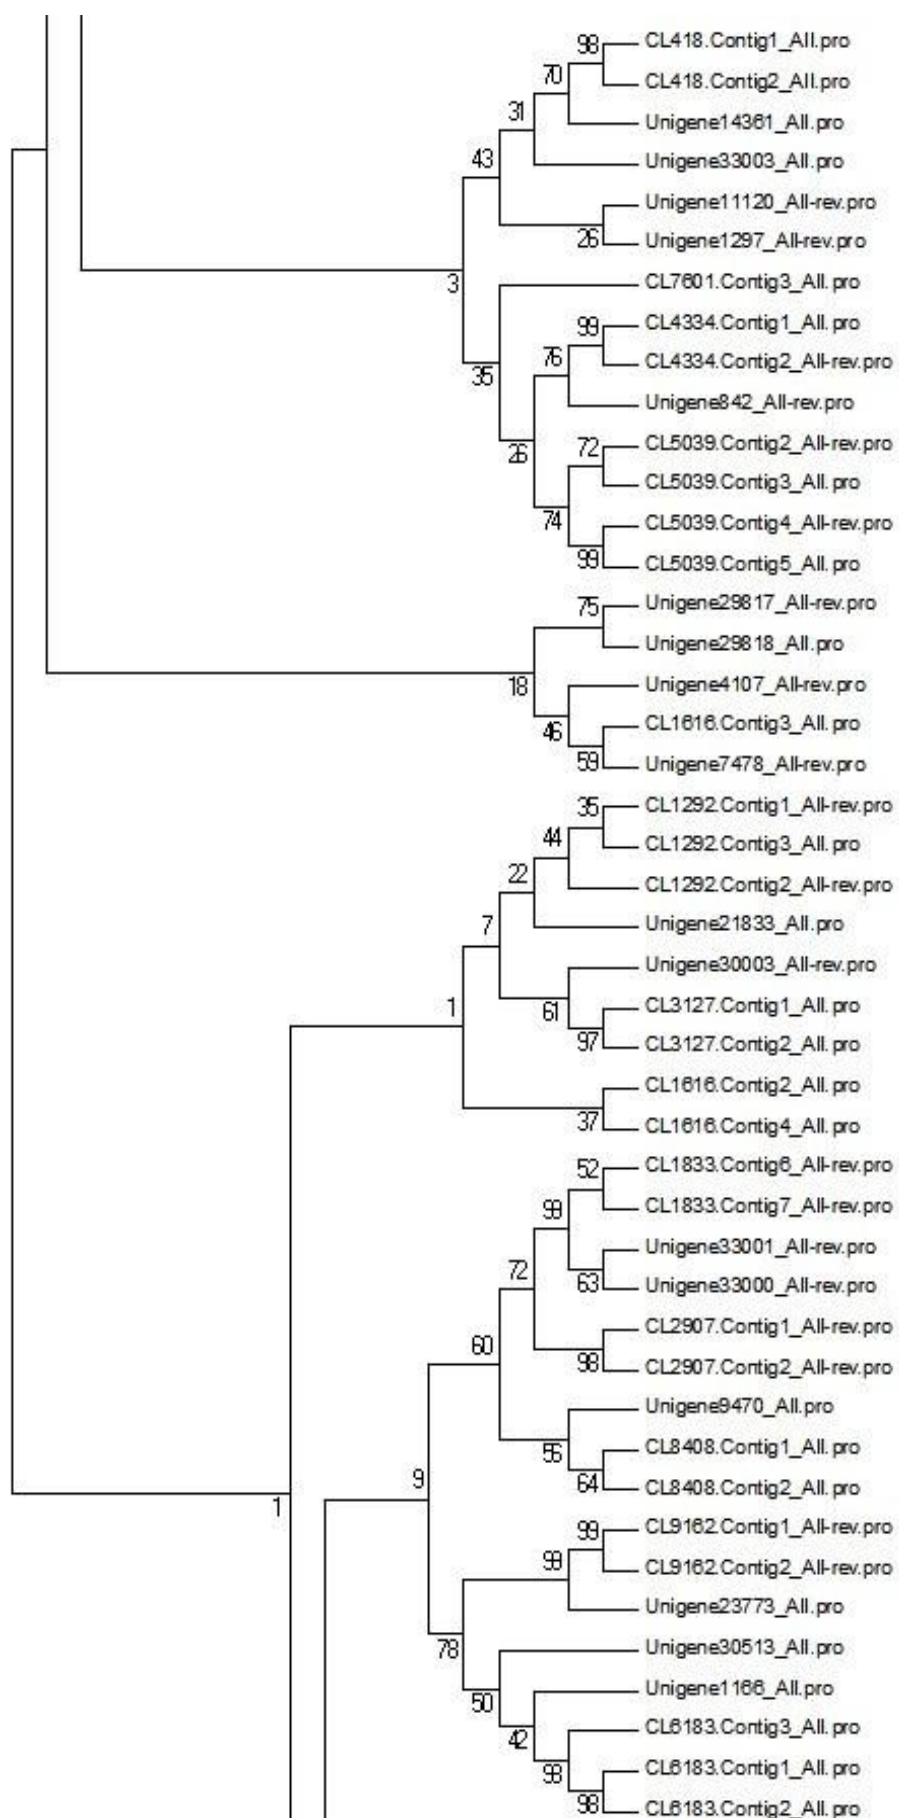

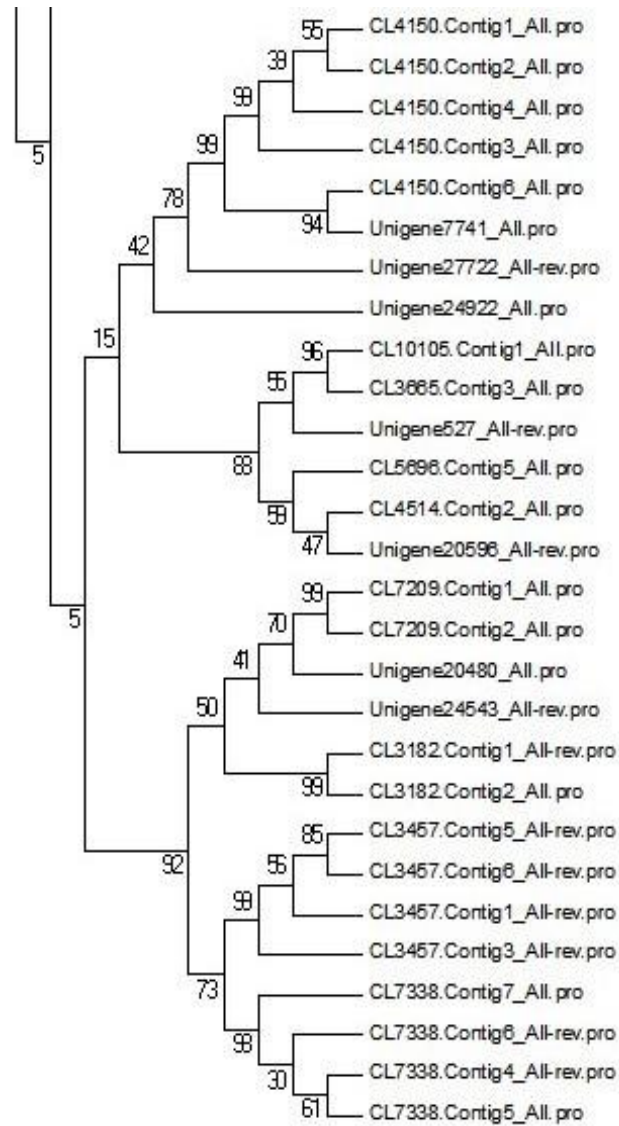

**Supplemental Figure S1** The intact phylogenetic tree of 156 putative bHLH proteins from *Acer palmatum* and eight reference bHLHs with known function of being involved in anthocyanin biosynthesis in other plants. The clade containing eight reference bHLHs and two putative targets was enclosed by the red dashed rectangle, which was presented as Figure 1 in the main text.

**Supplemental Table S1** The name list of 156 putative bHLH proteins (longer than 60 amino acids) in *Acer palmatum* and 8 reference bHLHs

|                             |                            |
|-----------------------------|----------------------------|
| CL10105.Contig1_All.pro     | CL3970.Contig1_All-rev.pro |
| CL1029.Contig27_All-rev.pro | CL3970.Contig2_All-rev.pro |
| CL1029.Contig29_All.pro     | CL3970.Contig4_All.pro     |
| CL10308.Contig2_All.pro     | CL4150.Contig1_All.pro     |
| CL10308.Contig3_All-rev.pro | CL4150.Contig2_All.pro     |
| CL1035.Contig5_All.pro      | CL4150.Contig3_All.pro     |
| CL1035.Contig8_All.pro      | CL4150.Contig4_All.pro     |
| CL1292.Contig1_All-rev.pro  | CL4150.Contig6_All.pro     |
| CL1292.Contig2_All-rev.pro  | CL418.Contig1_All.pro      |
| CL1292.Contig3_All.pro      | CL418.Contig2_All.pro      |
| CL1616.Contig1_All.pro      | CL4334.Contig1_All.pro     |
| CL1616.Contig2_All.pro      | CL4334.Contig2_All-rev.pro |
| CL1616.Contig3_All.pro      | CL4514.Contig2_All.pro     |
| CL1616.Contig4_All.pro      | CL4738.Contig1_All-rev.pro |
| CL1616.Contig5_All.pro      | CL4738.Contig2_All.pro     |
| CL1833.Contig6_All-rev.pro  | CL4849.Contig1_All-rev.pro |
| CL1833.Contig7_All-rev.pro  | CL4849.Contig2_All-rev.pro |
| CL1848.Contig1_All.pro      | CL4849.Contig4_All-rev.pro |
| CL1848.Contig3_All.pro      | CL4849.Contig5_All-rev.pro |
| CL2907.Contig1_All-rev.pro  | CL4857.Contig1_All.pro     |
| CL2907.Contig2_All-rev.pro  | CL4857.Contig2_All.pro     |
| CL2929.Contig1_All.pro      | CL5039.Contig2_All-rev.pro |
| CL2929.Contig2_All.pro      | CL5039.Contig3_All.pro     |
| CL3127.Contig1_All.pro      | CL5039.Contig4_All-rev.pro |
| CL3127.Contig2_All.pro      | CL5039.Contig5_All.pro     |
| CL3151.Contig1_All.pro      | CL5186.Contig2_All.pro     |
| CL3151.Contig2_All.pro      | CL5186.Contig3_All-rev.pro |
| CL3182.Contig1_All-rev.pro  | CL5696.Contig5_All.pro     |
| CL3182.Contig2_All.pro      | CL572.Contig3_All.pro      |
| CL3200.Contig1_All.pro      | CL572.Contig35_All.pro     |
| CL3200.Contig2_All.pro      | CL572.Contig36_All.pro     |
| CL3457.Contig1_All-rev.pro  | CL572.Contig5_All.pro      |
| CL3457.Contig3_All-rev.pro  | CL572.Contig60_All.pro     |
| CL3457.Contig5_All-rev.pro  | CL572.Contig71_All.pro     |
| CL3457.Contig6_All-rev.pro  | CL6183.Contig1_All.pro     |
| CL3641.Contig1_All-rev.pro  | CL6183.Contig2_All.pro     |
| CL3641.Contig2_All.pro      | CL6183.Contig3_All.pro     |
| CL3665.Contig3_All.pro      | CL6463.Contig1_All.pro     |
|                             | CL6463.Contig2_All.pro     |
|                             | CL7127.Contig1_All-rev.pro |

|                            |
|----------------------------|
| CL7127.Contig2_All-rev.pro |
| CL7209.Contig1_All.pro     |
| CL7209.Contig2_All.pro     |
| CL7338.Contig4_All-rev.pro |
| CL7338.Contig5_All.pro     |
| CL7338.Contig6_All-rev.pro |
| CL7338.Contig7_All.pro     |
| CL7601.Contig1_All.pro     |
| CL7601.Contig2_All.pro     |
| CL7601.Contig3_All.pro     |
| CL7601.Contig4_All-rev.pro |
| CL8408.Contig1_All.pro     |
| CL8408.Contig2_All.pro     |
| CL8881.Contig1_All.pro     |
| CL8881.Contig2_All.pro     |
| CL8881.Contig3_All.pro     |
| CL9162.Contig1_All-rev.pro |
| CL9162.Contig2_All-rev.pro |
| CL9889.Contig2_All.pro     |
| Unigene10591_All.pro       |
| Unigene11120_All-rev.pro   |
| Unigene11131_All.pro       |
| Unigene1166_All.pro        |
| Unigene11690_All.pro       |
| Unigene11901_All.pro       |
| Unigene1297_All-rev.pro    |
| Unigene13498_All.pro       |
| Unigene13561_All.pro       |
| Unigene14361_All.pro       |
| Unigene14501_All.pro       |
| Unigene14587_All-rev.pro   |
| Unigene14835_All.pro       |
| Unigene16378_All.pro       |
| Unigene17429_All-rev.pro   |
| Unigene20219_All.pro       |
| Unigene20480_All.pro       |
| Unigene20542_All-rev.pro   |
| Unigene20596_All-rev.pro   |
| Unigene21161_All-rev.pro   |
| Unigene21833_All.pro       |
| Unigene23323_All-rev.pro   |
| Unigene23324_All-rev.pro   |
| Unigene23515_All-rev.pro   |

|                           |
|---------------------------|
| Unigene23765_All-rev.pro  |
| Unigene23773_All.pro      |
| Unigene24001_All.pro      |
| Unigene24403_All-rev.pro  |
| Unigene24418_All.pro      |
| Unigene24543_All-rev.pro  |
| Unigene24875_All.pro      |
| Unigene24922_All.pro      |
| Unigene27722_All-rev.pro  |
| Unigene29817_All-rev.pro  |
| Unigene29818_All.pro      |
| Unigene29948_All-rev.pro  |
| Unigene30003_All-rev.pro  |
| Unigene30513_All.pro      |
| Unigene31035_All.pro      |
| Unigene33000_All-rev.pro  |
| Unigene33001_All-rev.pro  |
| Unigene33002_All.pro      |
| Unigene33003_All.pro      |
| Unigene33203_All.pro      |
| Unigene33566_All.pro      |
| Unigene33670_All-rev.pro  |
| Unigene34215_All-rev.pro  |
| Unigene34283_All.pro      |
| Unigene34478_All.pro      |
| Unigene34840_All.pro      |
| Unigene4107_All-rev.pro   |
| Unigene47552_All.pro      |
| Unigene527_All-rev.pro    |
| Unigene7300_All-rev.pro   |
| Unigene7426_All.pro       |
| Unigene7478_All-rev.pro   |
| Unigene7741_All.pro       |
| Unigene842_All-rev.pro    |
| Unigene9470_All.pro       |
| At1g63650-EGL3.pro        |
| <b>At4g09820-TT8.pro</b>  |
| <b>At5g41315-GL3.pro</b>  |
| <b>MdbHLH3.pro</b>        |
| <b>MdbHLH33.pro</b>       |
| <b>MtTT8-KM892777.pro</b> |
| <b>PhAN1-AAG25928.pro</b> |
| <b>VvACC68685.pro</b>     |

**Supplemental Table S2** Percentage of residue identity between two putative target bHLH proteins and five reference proteins

|                    | VvMYC1 | MdbHLH3 | MtTT8 | PhAN1 | AtTT8 |
|--------------------|--------|---------|-------|-------|-------|
| Unigene13498_All   | 68.8   | 65.4    | 59.5  | 58.0  | 55.1  |
| CL8881.contig2_All | 54.4   | 52.8    | 47.9  | 47.2  | 51.1  |

The deduced protein sequences deduced from assembled transcripts of Unigene13498\_All and CL8881.contig2\_All were aligned with five reference bHLHs using ClustalW of MegAlign (DNASTAR, Madison, USA).

**Supplemental Table S3** Open reading frame of *ApbHLH1* (2130 bp)

ATGGCTGCGCCGCGAGTAGCCGGCTTCAAAGTATGCTGCAGGAGGCGGT  
 GCAATCAGTTCAGTGGACTTACAGTCTCTT  
 TTGGCAAATCTGTCCACAACAAGGGATCCTAATATGGGGAGATGGGTATTAT  
 AATGGAGCAATTAAGACAAGGAAAACAG  
 TGCAACCGATGGAGGTGAGTGCGGAGGAAGCGTCTCTGCAAAGAAGCCA  
 GCAGCTTAGAGAGCTTTACGAGTCATTGTCG  
 GCTGGAGAGACGAACCAGCCAGCAAGGAGGCCTTGTGCTTCGTTGTGCGC  
 GGAGGACTTAACGGAGTCGGAGTGTTCTA  
 TTTGATGTGTGTGTCCTTCTCTTTCCACCTGGCCTCGGGTTACCTGGAAAG  
 GCATACGCAAGGCGGCAACATGTATGGC  
 TTACAGGAGCGAACGAGGTTGACAGCAAAACCTTCTCTAGAGCAATTCTT  
 GCCAAGAGTGCTCGTATACAGACTGTGTTA  
 TGCATTCCTCTTCTTGACGGCGTCGTTGAATTGGGCTCAACAGATAGGATAC  
 AAGAGGACCTTGGATTGGTCCAACAAAT  
 CAAGAGCTTCTTCACAGACCAACACCACCCAAACCCTCAACCACCAAAAC  
 CAGCTCTCTCCGAGCACTCCACCTCCAATC  
 CCGCCACGTCATCCGACCACCGCCGCTTCCACTCACCTCCAATTCCGGCCA  
 TGTACGCCGCTGTTGACCCACCAGCCAAC  
 CCCAACCAAGAAGACGAAGACGACGAAGAAGAGGAGGAAGAGGAAGAA

GAAGAAGACGAAGAGGAGGAGCAAGAGTCTGA  
CTCTGAAGCCGAAACGGGTCGCATCAGAAGCCAAGGCGCCGCTCAAAACC  
CTCAATCCGTGGCTCCACCCATGGCTGAAC  
CGAGTGAGCTCATGCAGCTGGAGATGTCTGAGGATATCCGAGTTGGATCCC  
CCGACGATGCGTCGAATAATTTGGACTCA  
GATTTTCATATGTTGGCCGTGAGCCAAGCCGTGAACCCGGGTGATCACCAG  
CGGCGCTCTGACTCGTTCAGAGCTGAGTC  
GAGTCGAAGGTGGCCGATGCTACAAGAACCATTGACCGGTAGTGGTCTTCC  
ACCACCACCTCCTTCAGCTTCAGGACAAC  
TTGGAATGGAAGAATTGACACAAGAAGACACTCACTACTCCCAAACCGTG  
TCAACCATTATCCAAAAGCAGACAACACGG  
TGGGCCGAATCATCGTCTACCGGCTACGTACGTACTCAACCCAGTCAGCG  
TTTGCCAAGTGGACAAACCGGTCGGACCT  
CCACCTCCAGATTCCCGTGGAAGGCACGTCTCAGTGGCTCCTCAAGTACAT  
TTTGTTTCAGCGTACCTTTTCTACACAGCA  
AATACCGTGATGAAAACCTCCCCCAAGTCACGTGACGCCAGCACCGCCGAC  
GCGGCCTCCAAGTTCCGTAAAGGGACCTCA  
CAAGACGAGCTGAGTGCCAACCACGTGCTGGCGGAGCGCCGCCGCCGCG  
AGAAGTTAAACGAGAGGTTTCATCATTTTAAAG  
GTCATTAGTCCCCTTCGTCACTAAAATGGACAAGGCCTCCATATTGGGTGAC  
ACTATCGAGTACGTCAAACAGTTGCGTA  
AAAAGATTTCAGGATCTCGAGACACGTAACAAGCAGATGGAGACCGATCAA  
CGGTCAAGATTGTCGGATTCTCCAAGGACT  
AGTAGTGGTTTGAAAGAGCAGAGAAGTGGGTTGACTGTTTTGGACCGGGC  
ACGGGTGGGTCTGACCCGGGTCTGATAA  
GAGGAAGATGAGGATAGTGGAGACAAGTAGCGGCGTTGCAAAGCCTAAGA  
CGGTGGAGTCACCGCCACTGCCAACACCAT  
TAACGACAACACCGACGGCGACAACAACGGCTAGTACGGTACAGGTGTCG  
ATCATCGAGAGTGATGCGTTGGTGGAGCTG  
CAATGTGGGTATAGAGAAGGGTTGTTGCTTGATATCATGCTAATGCTAAGGG  
AGCTTCTGATTGAAGTCACAGCAGTTCA  
ATCTTCTCTAACTAATGGAGCTTTTGTAGCTCAGCTAAGGGCAAAGGTGAA  
AGATAATGTAAATGGGAAAAAAGCAAGCA  
TTGTGGAAGTCAAGAGAGCAATACATCAACTGATACCCCAACAATACTGA



**Supplemental Table S4** Primers used in this study

| Name        | Sequence (5' to 3')                         | Application                             |
|-------------|---------------------------------------------|-----------------------------------------|
| bH-f1       | CCACTGAAATTTGGAAGTGAGA                      | Cloning <i>ApbHLH1</i>                  |
| bH-f2       | GAAGTGAGAATTCAATCCCAAGTTA                   | Cloning <i>ApbHLH1</i>                  |
| bH-f3       | TTCAATCCCAAGTTAGTGAAGAAG                    | Cloning <i>ApbHLH1</i>                  |
| bH-f4       | GTGAAGAAGATCTACCGTTGAATAC<br>AG             | Cloning <i>ApbHLH1</i>                  |
| bH-f5       | AGATCATTGCTAGGACTGCTTTG                     | Cloning <i>ApbHLH1</i>                  |
| bH-f6       | TTTGTAAGCACACATGGTGGAC                      | Cloning <i>ApbHLH1</i>                  |
| bH-f7       | AGGGTCAAACAGGGAGACAAC                       | Cloning <i>ApbHLH1</i>                  |
| bH-r1       | GGCGACTCGAATGATTAGAACA                      | Cloning <i>ApbHLH1</i>                  |
| bH-r2       | TGCAAATTACCTGACACAGTTTG                     | Cloning <i>ApbHLH1</i>                  |
| bH-r3       | ATTGGCATGCTTTCTTGAGC                        | Cloning <i>ApbHLH1</i>                  |
| bH-r4       | CCTGATTACTCGTGAGTTGTGAAA                    | Cloning <i>ApbHLH1</i>                  |
| qAcUBQ-f    | AGGCCAAAATTCAGGACAAG                        | qPCR                                    |
| qAcUBQ-r    | CGAAGGACAAGATGCAGAGTAG                      | qPCR                                    |
| qApbHLH1-f  | CGTAACAAGCAGATGGAGACC                       | qPCR                                    |
| qApbHLH1-r  | CCAAAACAGTCAACCCACTTC                       | qPCR                                    |
| PCCL-bHLH-f | ACGGGGGACGAGCTCGGTACCATGGCTG<br>CGCCGCCGAGT | Generating<br>PCCL-ApbHLH1<br>construct |
| PCCL-bHLH-r | CGCGTACGAGATCTGGTCGACGTATTGTT               | Generating                              |

|                |                                                                                      |                                                                                    |
|----------------|--------------------------------------------------------------------------------------|------------------------------------------------------------------------------------|
|                | GGGGTATCAGTTGATGTAT                                                                  | PCCL-ApbHLH1 construct                                                             |
| PHNL-bHLH-F    | ACGGGGGACGAGCTCGGTACCATGGCTG<br>CGCCGCCGAGT                                          | Generating PHNL-ApbHLH1 construct                                                  |
| PHNL-bHLH-R    | AACATCGTATGGGTAGTCGACGTATTGTT<br>GGGGTATCAGTTGATGTAT                                 | Generating PHNL-ApbHLH1 construct                                                  |
| PCCL-MYB-F     | ACGGGGGACGAGCTCGGTACCATGACCA<br>TGGTAGAGGGATTTGTAG                                   | Generating PCCL-ApMYB1 construct                                                   |
| PCCL-MYB-R     | CGCGTACGAGATCTGGTCGACAATTGCAT<br>ATTCTTCTTCTGTGTTAAGA                                | Generating PCCL-ApMYB1 construct                                                   |
| PHNL-MYB-F     | ACGGGGGACGAGCTCGGTACCATGACCA<br>TGGTAGAGGGATTTGTAG                                   | Generating PHNL-ApMYB1 construct                                                   |
| PHNL-MYB-R     | AACATCGTATGGGTAGTCGACAATTGCAT<br>ATTCTTCTTCTGTGTTAAGA                                | Generating PHNL-ApMYB1 construct                                                   |
| PCCL-bHLH1T-f  | ACGGGGGACGAGCTCGGTACCATGGGAG<br>ATGGGTATTATAATGGAG                                   | Paired with PCCL-bHLH-r to generate PCCL-ApbHLH1T                                  |
| PCCL-MYB1D-R1  | GTTCTTCCAGGGACTTCATCTTCAGTGAA<br>CTCTCCTCT                                           | Paired with PCCL-MYB-f to get fragment before bHLH binding domain in <i>ApMYB1</i> |
| PCCL-MYB1D-2F1 | GATGAAGTCCCTGGAAGAACAGCAAATG<br>ATGT                                                 | Paired with PCCL-MYB-r to get fragment after bHLH binding domain in <i>ApMYB1</i>  |
| ApbHLH1-F      | <u>ttagatct</u> GAATACAGTTTCTAAACAATGGCT<br>G (underlined nucleotides as BglII site) | Generating pCAMIA1305-ApbHLH1 construct ( <i>35S::ApbHLH1</i> )                    |
| ApbHLH1-R      | <u>tcgtttaaac</u> TCAGTATTGTTGGGGTATCAGTT<br>G (underlined nucleotides as PmeI site) | Generating pCAMIA1305-ApbHLH1 construct ( <i>35S::ApbHLH1</i> )                    |
